# Supplementary material for: A unifying structural and functional model of the coronavirus replication organelle: Tracking down RNA synthesis
Source: PLoS Biol. 2020 Jun 8;18(6):e3000715. doi: 10.1371/journal.pbio.3000715 (PMC7302735; doi:10.1371/journal.pbio.3000715)
Supplement: S3 Data — MERS-CoV, Middle East respiratory syndrome-coronavirus; SARS-CoV, severe acute respiratory syndrome-coronavirus. (XLSX) [file pbio.3000715.s006.xlsx]

## Sheet: Overview
			Data set		Annotations
Sample	Labelling	Sample code	Meshes	Cell profiles	ROIs(*)	ROI size (µm2)	Total annotated area (μm2)(*)	Total label (*)	Kendall coefficient	Spearman coefficient
SARS-CoV-infected Vero E6 cells	20 min	SARS20	5	235	350.96	4	1403.84	1367	0.84	0.926
SARS-CoV-infected Vero E6 cells	60 min	SARS60	8	293	212.4	4	849.6	3015	0.813	0.903
Mock-infected Vero E6 cells	60 min	Mock60	4	104	436.32	4	1745.28	607	0.84	0.91
MERS-CoV-infected Huh7 cells	30 min	MERS30	7	238	209.64	4	838.56	2324	0.866	0.971
MERS-CoV-infected Huh7 cells	60 min	MERS60	3	123	211	4	844	2233	0.885	0.927
Mock-infected Huh7 cells	60 min	Mock60	3	81	204.68	4	818.72	2219	0.92	0.97
(*) all the numbers were calculated excluding from the randomly selected regions those subareas that were outside the cells

## Sheet: SARS-CoV
4	ROI area (μm2)
25	grid points per ROI (5x5)
0.16	area (μm2) represented per grid point
	SARS20							SARS60							Mock60
		label	expected	LD					label	expected	LD					label	expected	LD
	grid counts	counts	(if random)	(counts/μm2)	RLI			grid counts	counts	(if random)	(counts/μm2)	RLI			grid counts	counts	(if random)	(counts/μm2)	RLI
RO regions	182	478	28.3558	16.4148	16.8572			164	1133	93.1186	43.1784	12.1673			0	0	0
Spherules	1409	87	219.524	0.385912	0.396312			1145	95	650.127	0.518559	0.146125			2135	132	118.807	0.386417	1.11105
Nucleus	5664	622	882.458	0.686352	0.704849			3013	1317	1710.77	2.73191	0.769828			6302	290	350.689	0.287607	0.826944
Cytosol	431	64	67.1503	0.928074	0.953085			307	186	174.314	3.78664	1.06704			700	99	38.9531	0.883929	2.54152
Mitochondria	344	66	53.5956	1.19913	1.23144			179	132	101.636	4.60894	1.29876			550	28	30.606	0.318182	0.914854
ER	149	17	23.2144	0.713087	0.732305			126	68	71.5424	3.37302	0.950486			448	21	24.93	0.292969	0.84236
Golgi	523	31	81.484	0.370459	0.380443			335	53	190.212	0.988806	0.278637			773	37	43.0153	0.299159	0.860159
VCR	72	2	11.2177	0.173611	0.17829			41	31	23.2797	4.72561	1.33163			0	0	0
Totals	8774	1367					Totals	5310	3015					Totals	10908	607
Total #ROIs	350.96						Total #ROIs	212.4						Total #ROIs	436.32

## Sheet: MERS-CoV
4	ROI area (μm2)
25	grid points per ROI (5x5)
0.16	area (μm2) represented per grid point
	MERS30							MERS60							Mock60
		label	expected	LD					label	expected	LD					label	expected	LD
	grid counts	counts	(if random)	(counts/μm2)	RLI			grid counts	counts	(if random)	(counts/μm2)	RLI			grid counts	counts	(if random)	(counts/μm2)	RLI
RO regions	54	239	23.945	27.662	9.98119			22	177	9.31299	50.2841	19.0057			0	0	0
Spherules	1543	546	684.208	2.2116	0.798003			1672	552	707.787	2.0634	0.779896			1503	740	651.78	3.07718	1.13535
Nucleus	2687	1006	1191.49	2.33997	0.844322			2524	823	1068.45	2.03794	0.770272			2690	933	1166.53	2.16775	0.799811
Cytosol	223	126	98.8842	3.53139	1.27422			237	215	100.326	5.66983	2.14301			244	164	105.811	4.20082	1.54993
Mitochondria	350	235	155.199	4.19643	1.51418			420	274	177.793	4.07738	1.54111			345	212	149.61	3.84058	1.41702
ER	110	53	48.777	3.01136	1.08658			220	114	93.1299	3.23864	1.2241			110	70	47.7018	3.97727	1.46745
Golgi	265	118	117.508	2.78302	1.00419			162	72	68.5774	2.77778	1.04991			225	100	97.5718	2.77778	1.02489
VCR	9	1	3.99084	0.694444	0.250574			18	6	7.61972	2.08333	0.787431			0	0	0
Totals	5241	2324					Totals	5275	2233					Totals	5117	2219
Total #ROIs	209.64						Total #ROIs	211						Total #ROIs	204.68
															`
